# Supplementary material for: Integration of Metabolomic and Proteomic Phenotypes: Analysis of Data Covariance Dissects Starch and RFO Metabolism from Low and High Temperature Compensation Response in Arabidopsis Thaliana
Source: PubMed Central journal article supplement — Mol Cell Proteomics. 2008 Sep;7(9):1725–36. doi: 10.1074/mcp.M700273-MCP200 (PMC2556022; doi:10.1074/mcp.m700273-mcp200), 2008-09
Supplement: M700273-MCP200v2_1.pdf [file M700273-MCP200v2_1.pdf]

## Supplementary material Table S1

Changes in metabolite ratios of 4°C/20°C and 32°C/20°C treated plant samples. To test for differences in the median concentrations between stressed and unstressed plants we used Kruskal-Wallis one-way analysis (ANOVA) by ranks implemented in Matlab® 7.0.

Differences were considered statistically significant at  $P < 0.05$ . (n.s.d. no significant difference)

|                                        | PGM 4°C     |             | PGM 32°C    |             | Col-0 4°C  |             | Col-0 32°C  |             |
|----------------------------------------|-------------|-------------|-------------|-------------|------------|-------------|-------------|-------------|
|                                        | X-<br>fold  | p-<br>value | X-<br>fold  | p-<br>value | X-<br>fold | p-<br>value | X-<br>fold  | p-<br>value |
| 1,6-anhydro-beta-glucopyranose         | <b>1.5</b>  | ( 0.025 )   | n.s.d.      |             | n.s.d.     |             | <b>1.5</b>  | ( 0.037 )   |
| 2-ethyl-3-hydroxy-3-methylvaleric acid | <b>2.9</b>  | ( 0.004 )   | <b>-1.9</b> | ( 0.004 )   | n.s.d.     |             | n.s.d.      |             |
| 2-ketoglutaric acid                    | n.s.d.      |             | n.s.d.      |             | <b>2.4</b> | ( 0.006 )   | n.s.d.      |             |
| 3-methyl 3-hydroxy-glutaric acid       | <b>1.7</b>  | ( 0.025 )   | <b>3.4</b>  | ( 0.004 )   | n.s.d.     |             | <b>1.9</b>  | ( 0.004 )   |
| 4-aminobutyric acid                    | <b>1.5</b>  | ( 0.004 )   | <b>2.0</b>  | ( 0.004 )   | <b>3.1</b> | ( 0.018 )   | <b>2.1</b>  | ( 0.004 )   |
| 4-hydroxyproline                       | n.s.d.      |             | n.s.d.      |             | n.s.d.     |             | <b>1.8</b>  | ( 0.004 )   |
| 6-hydroxy-nicotinic acid               | <b>1.2</b>  | ( 0.025 )   | <b>-1.2</b> | ( 0.025 )   | n.s.d.     |             | n.s.d.      |             |
| agmatine                               | <b>2.1</b>  | ( 0.004 )   | n.s.d.      |             | <b>2.7</b> | ( 0.018 )   | <b>2.2</b>  | ( 0.010 )   |
| alanine                                | <b>3.1</b>  | ( 0.004 )   | n.s.d.      |             | n.s.d.     |             | n.s.d.      |             |
| allantoin                              | n.s.d.      |             | <b>1.7</b>  | ( 0.004 )   | n.s.d.     |             | <b>3.3</b>  | ( 0.004 )   |
| arginine / ornithine                   | n.s.d.      |             | <b>-4.0</b> | ( 0.004 )   | <b>2.2</b> | ( 0.006 )   | n.s.d.      |             |
| ascorbic acid                          | n.s.d.      |             | n.s.d.      |             | n.s.d.     |             | n.s.d.      |             |
| asparagine                             | n.s.d.      |             | n.s.d.      |             | n.s.d.     |             | n.s.d.      |             |
| aspartic acid                          | <b>1.7</b>  | ( 0.004 )   | <b>-1.2</b> | ( 0.025 )   | <b>1.7</b> | ( 0.011 )   | <b>-1.5</b> | ( 0.016 )   |
| benzoic acid                           | <b>1.3</b>  | ( 0.025 )   | n.s.d.      |             | n.s.d.     |             | n.s.d.      |             |
| beta-alanine                           | <b>1.9</b>  | ( 0.004 )   | <b>-1.3</b> | ( 0.004 )   | n.s.d.     |             | <b>-1.3</b> | ( 0.010 )   |
| citramalic acid                        | <b>1.3</b>  | ( 0.010 )   | n.s.d.      |             | n.s.d.     |             | n.s.d.      |             |
| citric acid                            | <b>-1.3</b> | ( 0.037 )   | <b>-2.1</b> | ( 0.004 )   | n.s.d.     |             | <b>-2.8</b> | ( 0.004 )   |
| citrulline                             | n.s.d.      |             | <b>-6.1</b> | ( 0.004 )   | <b>4.2</b> | ( 0.028 )   | <b>-1.7</b> | ( 0.037 )   |

|                           |                       |                       |                       |                       |
|---------------------------|-----------------------|-----------------------|-----------------------|-----------------------|
| dehydroascorbic acid      | <b>1.6</b> ( 0.004 )  | n.s.d.                | n.s.d.                | n.s.d.                |
| erythritol                | <b>1.4</b> ( 0.010 )  | <b>1.8</b> ( 0.004 )  | n.s.d.                | <b>2.3</b> ( 0.004 )  |
| ethanolamine              | n.s.d.                | n.s.d.                | <b>-2.9</b> ( 0.045 ) | n.s.d.                |
| ferulic acid              | n.s.d.                | n.s.d.                | n.s.d.                | n.s.d.                |
| fructose                  | <b>2.4</b> ( 0.004 )  | <b>-3.8</b> ( 0.004 ) | n.s.d.                | <b>1.9</b> ( 0.006 )  |
| fructose-6-phosphate      | <b>2.2</b> ( 0.004 )  | <b>-1.7</b> ( 0.006 ) | <b>3.4</b> ( 0.006 )  | <b>1.3</b> ( 0.037 )  |
| fucose                    | <b>1.4</b> ( 0.004 )  | n.s.d.                | n.s.d.                | <b>1.3</b> ( 0.004 )  |
| fumaric acid              | n.s.d.                | <b>2.0</b> ( 0.004 )  | <b>1.3</b> ( 0.028 )  | <b>1.7</b> ( 0.004 )  |
| galactinol                | <b>41.6</b> ( 0.004 ) | <b>10.4</b> ( 0.004 ) | <b>13.1</b> ( 0.018 ) | <b>21.0</b> ( 0.004 ) |
| glucose                   | <b>1.3</b> ( 0.004 )  | <b>-1.3</b> ( 0.004 ) | n.s.d.                | n.s.d.                |
| glucose-1-phosphate       | <b>1.6</b> ( 0.004 )  | n.s.d.                | n.s.d.                | <b>1.6</b> ( 0.004 )  |
| glucose-6-phosphate       | <b>2.4</b> ( 0.004 )  | <b>-2.1</b> ( 0.010 ) | <b>2.8</b> ( 0.028 )  | n.s.d.                |
| glutamic acid             | n.s.d.                | <b>-1.2</b> ( 0.016 ) | <b>1.6</b> ( 0.018 )  | <b>-1.2</b> ( 0.037 ) |
| glutamine                 | <b>5.4</b> ( 0.004 )  | <b>-2.0</b> ( 0.037 ) | <b>14.2</b> ( 0.006 ) | n.s.d.                |
| glyceric acid             | <b>-3.4</b> ( 0.004 ) | <b>-1.9</b> ( 0.004 ) | <b>-6.8</b> ( 0.028 ) | <b>-1.7</b> ( 0.004 ) |
| glycerol                  | <b>2.9</b> ( 0.004 )  | n.s.d.                | n.s.d.                | <b>1.7</b> ( 0.004 )  |
| glycerolphosphate         | <b>1.9</b> ( 0.006 )  | <b>1.9</b> ( 0.010 )  | <b>4.0</b> ( 0.045 )  | <b>3.3</b> ( 0.004 )  |
| glycine                   | <b>1.5</b> ( 0.004 )  | n.s.d.                | <b>7.5</b> ( 0.028 )  | <b>-1.9</b> ( 0.004 ) |
| homoserine                | n.s.d.                | <b>-1.3</b> ( 0.016 ) | <b>2.6</b> ( 0.011 )  | <b>-1.8</b> ( 0.004 ) |
| hydroxybenzoic acid       | n.s.d.                | n.s.d.                | n.s.d.                | n.s.d.                |
| inositol-beta-galactoside | n.s.d.                | n.s.d.                | <b>44.8</b> ( 0.045 ) | <b>3.6</b> ( 0.004 )  |
| isoleucine                | <b>1.5</b> ( 0.010 )  | <b>2.2</b> ( 0.004 )  | n.s.d.                | <b>1.2</b> ( 0.006 )  |
| leucine                   | <b>2.0</b> ( 0.004 )  | n.s.d.                | <b>1.9</b> ( 0.045 )  | <b>-1.3</b> ( 0.004 ) |
| lysine                    | <b>-1.6</b> ( 0.004 ) | <b>1.2</b> ( 0.037 )  | n.s.d.                | <b>1.4</b> ( 0.016 )  |
| malic acid                | <b>1.7</b> ( 0.004 )  | <b>1.4</b> ( 0.016 )  | <b>1.8</b> ( 0.011 )  | n.s.d.                |
| maltose                   | n.s.d.                | <b>-1.3</b> ( 0.025 ) | n.s.d.                | n.s.d.                |
| methionine                | <b>1.9</b> ( 0.004 )  | n.s.d.                | <b>2.0</b> ( 0.011 )  | n.s.d.                |
| myo-inositol              | <b>1.6</b> ( 0.037 )  | <b>1.7</b> ( 0.025 )  | <b>1.1</b> ( 0.045 )  | <b>1.9</b> ( 0.004 )  |
| o-acetyl-serine           | <b>2.2</b> ( 0.004 )  | <b>1.4</b> ( 0.004 )  | n.s.d.                | <b>1.8</b> ( 0.004 )  |
| oxalic acid               | n.s.d.                | n.s.d.                | n.s.d.                | <b>1.8</b> ( 0.037 )  |
| parabanic acid            | n.s.d.                | <b>1.6</b> ( 0.006 )  | n.s.d.                | <b>1.8</b> ( 0.016 )  |
| phenylalanine             | <b>1.6</b> ( 0.004 )  | <b>-1.6</b> ( 0.004 ) | <b>3.9</b> ( 0.028 )  | <b>-1.4</b> ( 0.010 ) |
| phosphoric acid           | n.s.d.                | n.s.d.                | n.s.d.                | n.s.d.                |
| proline                   | <b>14.3</b> ( 0.004 ) | <b>-2.8</b> ( 0.004 ) | <b>17.6</b> ( 0.018 ) | <b>-2.4</b> ( 0.010 ) |
| putrescine                | <b>1.6</b> ( 0.010 )  | n.s.d.                | <b>3.3</b> ( 0.011 )  | <b>1.8</b> ( 0.004 )  |

|                     |                       |                       |                       |                       |
|---------------------|-----------------------|-----------------------|-----------------------|-----------------------|
| pyruvic acid        | <b>1.5</b> ( 0.010 )  | <b>-1.5</b> ( 0.025 ) | n.s.d.                | <b>-1.4</b> ( 0.025 ) |
| quercitrin          | <b>1.7</b> ( 0.010 )  | n.s.d.                | <b>1.4</b> ( 0.045 )  | n.s.d.                |
| raffinose           | <b>52.5</b> ( 0.004 ) | <b>17.2</b> ( 0.004 ) | <b>13.6</b> ( 0.018 ) | <b>16.7</b> ( 0.004 ) |
| ribose              | n.s.d.                | n.s.d.                | n.s.d.                | <b>1.5</b> ( 0.004 )  |
| ribulose / xylulose | n.s.d.                | <b>-1.2</b> ( 0.025 ) | <b>1.8</b> ( 0.018 )  | n.s.d.                |
| salicylic acid      | <b>2.2</b> ( 0.004 )  | n.s.d.                | n.s.d.                | n.s.d.                |
| serine              | <b>1.3</b> ( 0.025 )  | n.s.d.                | n.s.d.                | <b>-1.2</b> ( 0.037 ) |
| shikimic acid       | <b>1.7</b> ( 0.004 )  | <b>-1.7</b> ( 0.004 ) | n.s.d.                | <b>1.3</b> ( 0.004 )  |
| sinapinic acid      | n.s.d.                | n.s.d.                | n.s.d.                | n.s.d.                |
| spermidine          | n.s.d.                | n.s.d.                | n.s.d.                | n.s.d.                |
| succinic acid       | <b>-1.7</b> ( 0.004 ) | n.s.d.                | n.s.d.                | <b>-1.6</b> ( 0.004 ) |
| sucrose             | <b>1.7</b> ( 0.004 )  | n.s.d.                | <b>1.9</b> ( 0.045 )  | <b>1.2</b> ( 0.016 )  |
| syberylglycine      | <b>2.1</b> ( 0.004 )  | n.s.d.                | <b>4.7</b> ( 0.006 )  | <b>2.5</b> ( 0.004 )  |
| threitol            | n.s.d.                | n.s.d.                | n.s.d.                | <b>2.0</b> ( 0.010 )  |
| threonic acid       | n.s.d.                | n.s.d.                | n.s.d.                | n.s.d.                |
| threonine           | n.s.d.                | <b>-1.1</b> ( 0.006 ) | n.s.d.                | n.s.d.                |
| trehalose           | n.s.d.                | <b>-3.9</b> ( 0.016 ) | n.s.d.                | n.s.d.                |
| triethanolamine     | n.s.d.                | n.s.d.                | n.s.d.                | <b>1.5</b> ( 0.010 )  |
| tryptophane         | <b>2.4</b> ( 0.010 )  | n.s.d.                | <b>10.6</b> ( 0.028 ) | n.s.d.                |
| tyrosine            | n.s.d.                | n.s.d.                | <b>3.1</b> ( 0.045 )  | n.s.d.                |
| uric acid           | <b>1.8</b> ( 0.004 )  | <b>-1.4</b> ( 0.010 ) | n.s.d.                | n.s.d.                |
| valine              | <b>2.3</b> ( 0.004 )  | n.s.d.                | <b>2.4</b> ( 0.028 )  | <b>-1.2</b> ( 0.006 ) |
| xylose              | <b>1.3</b> ( 0.006 )  | n.s.d.                | n.s.d.                | n.s.d.                |
| CHO_1               | <b>3.2</b> ( 0.004 )  | <b>6.0</b> ( 0.055 )  | <b>52.3</b> ( 0.028 ) | <b>3.7</b> ( 0.004 )  |
| CHO_2               | <b>3.6</b> ( 0.004 )  | n.s.d.                | <b>13.8</b> ( 0.018 ) | n.s.d.                |
| CHO_3               | <b>2.6</b> ( 0.004 )  | <b>-1.7</b> ( 0.004 ) | <b>39.8</b> ( 0.045 ) | <b>2.2</b> ( 0.004 )  |
| CHO_4               | n.s.d.                | <b>4.4</b> ( 0.004 )  | n.s.d.                | <b>6.4</b> ( 0.004 )  |
| CHO_5               | n.s.d.                | <b>5.8</b> ( 0.004 )  | n.s.d.                | <b>7.0</b> ( 0.004 )  |
| CHO_6               | <b>1.6</b> ( 0.004 )  | <b>4.5</b> ( 0.004 )  | n.s.d.                | <b>6.3</b> ( 0.004 )  |
| unknown_1           | <b>2.0</b> ( 0.004 )  | n.s.d.                | <b>8.2</b> ( 0.018 )  | <b>2.0</b> ( 0.004 )  |
| unknown_2           | <b>3.1</b> ( 0.004 )  | <b>-2.2</b> ( 0.004 ) | <b>8.0</b> ( 0.018 )  | <b>-1.2</b> ( 0.016 ) |
| unknown_3           | <b>4.1</b> ( 0.004 )  | <b>-1.7</b> ( 0.037 ) | <b>9.0</b> ( 0.018 )  | n.s.d.                |
| unknown_4           | n.s.d.                | <b>-6.7</b> ( 0.004 ) | <b>3.2</b> ( 0.011 )  | <b>-1.5</b> ( 0.037 ) |
| unknown_5           | n.s.d.                | <b>1.5</b> ( 0.006 )  | <b>-2.0</b> ( 0.006 ) | <b>2.3</b> ( 0.004 )  |
| unknown_6           | <b>1.5</b> ( 0.037 )  | n.s.d.                | n.s.d.                | <b>2.2</b> ( 0.004 )  |

|            |                       |                       |                       |                       |
|------------|-----------------------|-----------------------|-----------------------|-----------------------|
| unknown_7  | n.s.d.                | n.s.d.                | n.s.d.                | n.s.d.                |
| unknown_8  | n.s.d.                | n.s.d.                | n.s.d.                | n.s.d.                |
| unknown_9  | n.s.d.                | n.s.d.                | n.s.d.                | n.s.d.                |
| unknown_10 | n.s.d.                | n.s.d.                | n.s.d.                | n.s.d.                |
| unknown_11 | n.s.d.                | <b>1.3</b> ( 0.025 )  | n.s.d.                | <b>1.7</b> ( 0.004 )  |
| unknown_12 | n.s.d.                | <b>1.3</b> ( 0.025 )  | <b>1.3</b> ( 0.045 )  | <b>1.9</b> ( 0.004 )  |
| unknown_13 | n.s.d.                | n.s.d.                | n.s.d.                | n.s.d.                |
| unknown_14 | <b>2.3</b> ( 0.016 )  | n.s.d.                | n.s.d.                | n.s.d.                |
| unknown_15 | n.s.d.                | n.s.d.                | <b>-2.6</b> ( 0.006 ) | n.s.d.                |
| unknown_16 | <b>3.2</b> ( 0.004 )  | <b>-1.8</b> ( 0.004 ) | <b>5.0</b> ( 0.028 )  | <b>-1.4</b> ( 0.010 ) |
| unknown_17 | <b>1.5</b> ( 0.037 )  | n.s.d.                | n.s.d.                | <b>1.4</b> ( 0.004 )  |
| unknown_18 | n.s.d.                | n.s.d.                | n.s.d.                | n.s.d.                |
| unknown_19 | n.s.d.                | n.s.d.                | n.s.d.                | <b>1.4</b> ( 0.025 )  |
| unknown_20 | <b>3.3</b> ( 0.004 )  | <b>-1.5</b> ( 0.006 ) | <b>7.5</b> ( 0.011 )  | n.s.d.                |
| unknown_21 | <b>1.4</b> ( 0.004 )  | <b>1.6</b> ( 0.004 )  | <b>2.1</b> ( 0.018 )  | <b>1.5</b> ( 0.004 )  |
| unknown_22 | n.s.d.                | n.s.d.                | <b>-1.3</b> ( 0.018 ) | <b>1.2</b> ( 0.004 )  |
| unknown_23 | n.s.d.                | n.s.d.                | n.s.d.                | n.s.d.                |
| unknown_24 | n.s.d.                | n.s.d.                | n.s.d.                | n.s.d.                |
| unknown_25 | n.s.d.                | n.s.d.                | n.s.d.                | n.s.d.                |
| unknown_26 | <b>1.6</b> ( 0.025 )  | n.s.d.                | <b>7.0</b> ( 0.018 )  | <b>1.9</b> ( 0.004 )  |
| unknown_27 | n.s.d.                | <b>1.6</b> ( 0.037 )  | <b>2.6</b> ( 0.011 )  | <b>2.6</b> ( 0.004 )  |
| unknown_28 | n.s.d.                | n.s.d.                | <b>-1.8</b> ( 0.045 ) | n.s.d.                |
| unknown_29 | <b>1.1</b> ( 0.037 )  | n.s.d.                | n.s.d.                | n.s.d.                |
| unknown_30 | <b>-1.7</b> ( 0.010 ) | n.s.d.                | n.s.d.                | <b>2.0</b> ( 0.004 )  |
| unknown_31 | <b>-1.9</b> ( 0.004 ) | <b>1.6</b> ( 0.004 )  | <b>-4.6</b> ( 0.018 ) | <b>1.3</b> ( 0.006 )  |
| unknown_32 | n.s.d.                | n.s.d.                | n.s.d.                | n.s.d.                |
| unknown_33 | <b>1.7</b> ( 0.025 )  | n.s.d.                | -1.3 ( 0.855 )        | n.s.d.                |
| unknown_34 | <b>1.2</b> ( 0.037 )  | <b>1.4</b> ( 0.004 )  | 1.1 ( 0.465 )         | <b>1.5</b> ( 0.006 )  |
| unknown_35 | <b>1.8</b> ( 0.004 )  | <b>-1.6</b> ( 0.004 ) | 1.2 ( 0.715 )         | <b>-1.6</b> ( 0.004 ) |
| unknown_36 | <b>2.0</b> ( 0.004 )  | n.s.d.                | 1.3 ( 0.068 )         | n.s.d.                |
| unknown_37 | <b>-2.2</b> ( 0.004 ) | n.s.d.                | 1.3 ( 0.273 )         | <b>2.2</b> ( 0.004 )  |
| unknown_38 | <b>1.5</b> ( 0.004 )  | <b>-1.2</b> ( 0.025 ) | -1.2 ( 1.000 )        | n.s.d.                |
| unknown_39 | n.s.d.                | n.s.d.                | <b>-2.8</b> ( 0.018 ) | <b>-1.6</b> ( 0.006 ) |
| unknown_40 | n.s.d.                | n.s.d.                | n.s.d.                | n.s.d.                |
| unknown_41 | n.s.d.                | n.s.d.                | n.s.d.                | n.s.d.                |

|            |                |                |                |                |
|------------|----------------|----------------|----------------|----------------|
| unknown_42 | 1.7 ( 0.004 )  | n.s.d.         | n.s.d.         | 1.3 ( 0.004 )  |
| unknown_43 | 2.8 ( 0.004 )  | -2.1 ( 0.004 ) | 12.5 ( 0.006 ) | 1.9 ( 0.004 )  |
| unknown_44 | 1.7 ( 0.004 )  | n.s.d.         | n.s.d.         | n.s.d.         |
| unknown_45 | n.s.d.         | 1.4 ( 0.004 )  | n.s.d.         | 1.6 ( 0.004 )  |
| unknown_46 | 2.5 ( 0.004 )  | -2.1 ( 0.004 ) | 3.9 ( 0.028 )  | n.s.d.         |
| unknown_47 | 2.4 ( 0.004 )  | -2.1 ( 0.004 ) | 3.5 ( 0.045 )  | n.s.d.         |
| unknown_48 | n.s.d.         | n.s.d.         | 3.3 ( 0.018 )  | n.s.d.         |
| unknown_49 | 1.6 ( 0.004 )  | -2.5 ( 0.004 ) | n.s.d.         | -3.3 ( 0.004 ) |
| unknown_50 | n.s.d.         | n.s.d.         | n.s.d.         | 1.6 ( 0.010 )  |
| unknown_51 | n.s.d.         | n.s.d.         | n.s.d.         | n.s.d.         |
| unknown_52 | 1.3 ( 0.006 )  | -1.3 ( 0.006 ) | n.s.d.         | n.s.d.         |
| unknown_53 | -1.3 ( 0.037 ) | n.s.d.         | n.s.d.         | n.s.d.         |
| unknown_54 | n.s.d.         | n.s.d.         | -1.7 ( 0.018 ) | n.s.d.         |
| unknown_55 | n.s.d.         | n.s.d.         | n.s.d.         | -1.1 ( 0.873 ) |
| unknown_56 | n.s.d.         | n.s.d.         | -1.5 ( 0.045 ) | 1.0 ( 0.873 )  |
| unknown_57 | 1.7 ( 0.004 )  | n.s.d.         | n.s.d.         | 1.7 ( 0.010 )  |
| unknown_58 | 1.5 ( 0.010 )  | 1.9 ( 0.004 )  | n.s.d.         | 2.9 ( 0.004 )  |
| unknown_59 | n.s.d.         | n.s.d.         | n.s.d.         | 1.8 ( 0.006 )  |
| unknown_60 | n.s.d.         | -1.4 ( 0.037 ) | n.s.d.         | n.s.d.         |
| unknown_61 | n.s.d.         | n.s.d.         | n.s.d.         | n.s.d.         |
| unknown_62 | n.s.d.         | 1.4 ( 0.004 )  | n.s.d.         | 1.5 ( 0.004 )  |
| unknown_63 | n.s.d.         | n.s.d.         | n.s.d.         | 1.9 ( 0.004 )  |
| unknown_64 | n.s.d.         | 1.6 ( 0.004 )  | n.s.d.         | 1.4 ( 0.004 )  |
| unknown_65 | 1.2 ( 0.037 )  | 1.7 ( 0.004 )  | n.s.d.         | 1.8 ( 0.004 )  |
| unknown_66 | 2.5 ( 0.004 )  | 1.8 ( 0.004 )  | 1.6 ( 0.006 )  | n.s.d.         |
| unknown_67 | 1.2 ( 0.025 )  | n.s.d.         | 1.3 ( 0.045 )  | n.s.d.         |
| unknown_68 | n.s.d.         | n.s.d.         | n.s.d.         | n.s.d.         |
| unknown_69 | n.s.d.         | n.s.d.         | n.s.d.         | n.s.d.         |
| unknown_70 | 1.3 ( 0.004 )  | n.s.d.         | n.s.d.         | n.s.d.         |
| unknown_71 | n.s.d.         | n.s.d.         | n.s.d.         | n.s.d.         |
| unknown_72 | 1.3 ( 0.004 )  | 1.1 ( 0.037 )  | n.s.d.         | 1.4 ( 0.006 )  |
| unknown_73 | n.s.d.         | 1.4 ( 0.004 )  | n.s.d.         | 1.5 ( 0.004 )  |
| unknown_74 | n.s.d.         | n.s.d.         | -1.3 ( 0.018 ) | 1.1 ( 0.037 )  |
| unknown_75 | n.s.d.         | n.s.d.         | n.s.d.         | n.s.d.         |
| unknown_76 | n.s.d.         | 1.9 ( 0.004 )  | n.s.d.         | 1.8 ( 0.004 )  |

|            |                |                |                |               |
|------------|----------------|----------------|----------------|---------------|
| unknown_77 | -1.4 ( 0.025 ) | n.s.d.         | n.s.d.         | n.s.d.        |
| unknown_78 | 2.6 ( 0.004 )  | n.s.d.         | 2.0 ( 0.045 )  | 1.3 ( 0.004 ) |
| unknown_79 | n.s.d.         | n.s.d.         | n.s.d.         | 1.5 ( 0.004 ) |
| unknown_80 | n.s.d.         | -1.5 ( 0.006 ) | -1.5 ( 0.018 ) | n.s.d.        |
| unknown_81 | n.s.d.         | n.s.d.         | n.s.d.         | n.s.d.        |
| unknown_82 | -1.3 ( 0.004 ) | n.s.d.         | n.s.d.         | n.s.d.        |
| unknown_83 | n.s.d.         | -1.3 ( 0.037 ) | -2.0 ( 0.011 ) | n.s.d.        |
| unknown_84 | -1.4 ( 0.016 ) | n.s.d.         | n.s.d.         | n.s.d.        |
| unknown_85 | n.s.d.         | n.s.d.         | n.s.d.         | n.s.d.        |
| unknown_86 | -1.2 ( 0.004 ) | n.s.d.         | -1.2 ( 0.045 ) | 1.4 ( 0.010 ) |
| unknown_87 | n.s.d.         | n.s.d.         | 1.3 ( 0.028 )  | 1.5 ( 0.016 ) |
| unknown_88 | 1.5 ( 0.010 )  | n.s.d.         | n.s.d.         | 1.5 ( 0.006 ) |
| unknown_89 | n.s.d.         | n.s.d.         | n.s.d.         | 1.5 ( 0.037 ) |

Supplementary material Table S2

Changes in protein ratios of 4°C/20°C and 32°C/20°C treated plant samples. To test for differences in the median concentrations between stressed and unstressed plants we used Kruskal-Wallis one-way analysis (ANOVA) by ranks implemented in Matlab® 7.0.

955 Differences were considered statistically significant at  $P < 0.05$ .

|           | PGM 4°C              |         | PGM 32°C              |         | Col-0 4°C             |         | Col-0 32°C            |         | not detected in Col-0/PGM 20°C or PGM 32°C |
|-----------|----------------------|---------|-----------------------|---------|-----------------------|---------|-----------------------|---------|--------------------------------------------|
|           | X-fold               | p-value | X-fold                | p-value | X-fold                | p-value | X-fold                | p-value |                                            |
| At1g03130 | n.s.d.               |         | n.s.d.                |         | <b>-2.5</b> ( 0.028 ) |         | n.s.d.                |         |                                            |
| At1g03680 | n.s.d.               |         | n.s.d.                |         | n.s.d.                |         | n.s.d.                |         |                                            |
| At1g04410 | n.s.d.               |         | n.s.d.                |         | n.s.d.                |         | <b>-1.9</b> ( 0.005 ) |         |                                            |
| At1g06430 | n.s.d.               |         | <b>-2.3</b> ( 0.018 ) |         | <b>1.8</b> ( 0.048 )  |         | n.s.d.                |         |                                            |
| At1g06680 | n.s.d.               |         | <b>1.1</b> ( 0.037 )  |         | n.s.d.                |         | n.s.d.                |         |                                            |
| At1g07890 | n.s.d.               |         | n.s.d.                |         | n.s.d.                |         | n.s.d.                |         |                                            |
| At1g07920 | n.s.d.               |         | n.s.d.                |         | n.s.d.                |         | n.s.d.                |         |                                            |
| At1g08830 | <b>1.3</b> ( 0.036 ) |         | n.s.d.                |         | n.s.d.                |         | n.s.d.                |         |                                            |
| At1g09340 | n.s.d.               |         | n.s.d.                |         | n.s.d.                |         | n.s.d.                |         |                                            |
| At1g11430 | n.s.d.               |         | n.s.d.                |         | n.s.d.                |         | n.s.d.                |         |                                            |
| At1g11860 | n.s.d.               |         | n.s.d.                |         | n.s.d.                |         | n.s.d.                |         |                                            |
| At1g12900 | n.s.d.               |         | n.s.d.                |         | n.s.d.                |         | n.s.d.                |         |                                            |
| At1g13440 | n.s.d.               |         | n.s.d.                |         | n.s.d.                |         | n.s.d.                |         |                                            |
| At1g13930 | <b>1.3</b> ( 0.019 ) |         | n.s.d.                |         | n.s.d.                |         | n.s.d.                |         |                                            |
| At1g19570 | n.s.d.               |         | n.s.d.                |         | n.s.d.                |         | <b>5.6</b> ( 0.020 )  |         |                                            |
| At1g20260 | n.s.d.               |         | n.s.d.                |         | n.s.d.                |         | n.s.d.                |         |                                            |
| At1g20340 | n.s.d.               |         | n.s.d.                |         | n.s.d.                |         | n.s.d.                |         |                                            |
| At1g23410 | n.s.d.               |         | n.s.d.                |         | n.s.d.                |         | n.s.d.                |         |                                            |
| At1g23740 | n.s.d.               |         | n.s.d.                |         | n.s.d.                |         | n.s.d.                |         |                                            |
| At1g26630 | n.s.d.               |         | n.s.d.                |         | <b>3.6</b> ( 0.013 )  |         | n.s.d.                |         |                                            |
| At1g27400 | n.s.d.               |         | n.s.d.                |         | n.s.d.                |         | n.s.d.                |         |                                            |
| At1g31812 | n.s.d.               |         | n.s.d.                |         | n.s.d.                |         | n.s.d.                |         |                                            |
| At1g32470 | n.s.d.               |         | n.s.d.                |         | n.s.d.                |         | n.s.d.                |         |                                            |
| At1g32990 | n.s.d.               |         | n.s.d.                |         | <b>2.1</b> ( 0.033 )  |         | n.s.d.                |         |                                            |

|           |                      |                       |                       |                       |
|-----------|----------------------|-----------------------|-----------------------|-----------------------|
| At1g42970 | n.s.d.               | n.s.d.                | n.s.d.                | n.s.d.                |
| At1g47128 | n.s.d.               | n.s.d.                | <b>-1.9</b> ( 0.015 ) | <b>-2.1</b> ( 0.032 ) |
| At1g48030 | n.s.d.               | n.s.d.                | n.s.d.                | n.s.d.                |
| At1g48350 | n.s.d.               | n.s.d.                | n.s.d.                | n.s.d.                |
| At1g53240 | n.s.d.               | n.s.d.                | n.s.d.                | n.s.d.                |
| At1g55480 | n.s.d.               | n.s.d.                | n.s.d.                | n.s.d.                |
| At1g55490 | n.s.d.               | <b>1.9</b> ( 0.025 )  | n.s.d.                | n.s.d.                |
| At1g56190 | n.s.d.               | n.s.d.                | n.s.d.                | n.s.d.                |
| At1g64200 | <b>1.4</b> ( 0.015 ) | n.s.d.                | n.s.d.                | n.s.d.                |
| At1g67090 | n.s.d.               | n.s.d.                | n.s.d.                | n.s.d.                |
| At1g73230 | n.s.d.               | n.s.d.                | n.s.d.                | n.s.d.                |
| At1g74470 | n.s.d.               | n.s.d.                | n.s.d.                | <b>-2.3</b> ( 0.023 ) |
| At1g75350 | n.s.d.               | n.s.d.                | n.s.d.                | n.s.d.                |
| At1g78630 | n.s.d.               | <b>-1.8</b> ( 0.043 ) | n.s.d.                | n.s.d.                |
| At1g79040 | n.s.d.               | n.s.d.                | n.s.d.                | n.s.d.                |
| At2g16600 | n.s.d.               | <b>-1.8</b> ( 0.044 ) | n.s.d.                | n.s.d.                |
| At2g19760 | n.s.d.               | n.s.d.                | <b>-3.3</b> ( 0.019 ) | n.s.d.                |
| At2g20260 | n.s.d.               | n.s.d.                | n.s.d.                | n.s.d.                |
| At2g21130 | n.s.d.               | <b>2.6</b> ( 0.027 )  | n.s.d.                | <b>2.2</b> ( 0.022 )  |
| At2g21170 | n.s.d.               | n.s.d.                | n.s.d.                | n.s.d.                |
| At2g21640 | n.s.d.               | n.s.d.                | n.s.d.                | n.s.d.                |
| At2g21660 | <b>2.6</b> ( 0.045 ) | <b>-3.9</b> ( 0.019 ) | n.s.d.                | <b>-3.4</b> ( 0.003 ) |
| At2g21870 | n.s.d.               | n.s.d.                | n.s.d.                | n.s.d.                |
| At2g24020 | n.s.d.               | n.s.d.                | n.s.d.                | n.s.d.                |
| At2g28000 | n.s.d.               | n.s.d.                | n.s.d.                | n.s.d.                |
| At2g28190 | n.s.d.               | n.s.d.                | n.s.d.                | n.s.d.                |
| At2g33800 | n.s.d.               | n.s.d.                | n.s.d.                | n.s.d.                |
| At2g35370 | n.s.d.               | n.s.d.                | n.s.d.                | n.s.d.                |
| At2g36460 | n.s.d.               | n.s.d.                | n.s.d.                | n.s.d.                |
| At2g36530 | n.s.d.               | n.s.d.                | n.s.d.                | n.s.d.                |
| At2g37190 | n.s.d.               | n.s.d.                | n.s.d.                | n.s.d.                |
| At2g37220 | n.s.d.               | <b>-2.5</b> ( 0.004 ) | n.s.d.                | <b>-3.2</b> ( 0.004 ) |
| At2g37660 | n.s.d.               | n.s.d.                | n.s.d.                | n.s.d.                |
| At2g39730 | n.s.d.               | n.s.d.                | n.s.d.                | n.s.d.                |
| At2g44650 | <b>5.3</b> ( 0.049 ) | <b>6.8</b> ( 0.021 )  | n.s.d.                | n.s.d.                |



|           |        |                |               |                |
|-----------|--------|----------------|---------------|----------------|
| At3g01280 | n.s.d. | n.s.d.         | n.s.d.        | n.s.d.         |
| At3g01390 | n.s.d. | n.s.d.         | n.s.d.        | n.s.d.         |
| At3g01480 | n.s.d. | n.s.d.         | n.s.d.        | -2.3 ( 0.024 ) |
| At3g01500 | n.s.d. | n.s.d.         | n.s.d.        | n.s.d.         |
| At3g04790 | n.s.d. | n.s.d.         | n.s.d.        | n.s.d.         |
| At3g06610 | n.s.d. | n.s.d.         | n.s.d.        | n.s.d.         |
| At3g12780 | n.s.d. | n.s.d.         | n.s.d.        | n.s.d.         |
| At3g20390 | n.s.d. | n.s.d.         | n.s.d.        | n.s.d.         |
| At3g25920 | n.s.d. | n.s.d.         | n.s.d.        | n.s.d.         |
| At3g26060 | n.s.d. | n.s.d.         | n.s.d.        | n.s.d.         |
| At3g26450 | n.s.d. | 2.9 ( 0.006 )  | n.s.d.        | 4.4 ( 0.004 )  |
| At3g26650 | n.s.d. | n.s.d.         | n.s.d.        | n.s.d.         |
| At3g27830 | n.s.d. | n.s.d.         | n.s.d.        | n.s.d.         |
| At3g46780 | n.s.d. | n.s.d.         | n.s.d.        | n.s.d.         |
| At3g47070 | n.s.d. | n.s.d.         | n.s.d.        | n.s.d.         |
| At3g49120 | n.s.d. | -3.6 ( 0.021 ) | n.s.d.        | n.s.d.         |
| At3g50820 | n.s.d. | n.s.d.         | n.s.d.        | n.s.d.         |
| At3g52150 | n.s.d. | n.s.d.         | n.s.d.        | n.s.d.         |
| At3g52930 | n.s.d. | n.s.d.         | 2.4 ( 0.032 ) | n.s.d.         |
| At3g52960 | n.s.d. | 2.1 ( 0.016 )  | n.s.d.        | n.s.d.         |
| At3g53460 | n.s.d. | n.s.d.         | n.s.d.        | -4.2 ( 0.007 ) |
| At3g55440 | n.s.d. | n.s.d.         | n.s.d.        | n.s.d.         |
| At3g60750 | n.s.d. | n.s.d.         | n.s.d.        | n.s.d.         |
| At3g62030 | n.s.d. | n.s.d.         | n.s.d.        | n.s.d.         |
| At3g63190 | n.s.d. | n.s.d.         | n.s.d.        | n.s.d.         |
| At3g63490 | n.s.d. | n.s.d.         | n.s.d.        | n.s.d.         |
| At4g01310 | n.s.d. | n.s.d.         | n.s.d.        | n.s.d.         |
| At4g02530 | n.s.d. | -1.7 ( 0.042 ) | n.s.d.        | n.s.d.         |
| At4g03280 | n.s.d. | n.s.d.         | n.s.d.        | n.s.d.         |
| At4g03520 | n.s.d. | n.s.d.         | 1.9 ( 0.044 ) | n.s.d.         |
| At4g05180 | n.s.d. | n.s.d.         | n.s.d.        | n.s.d.         |
| At4g08390 | n.s.d. | n.s.d.         | 1.8 ( 0.039 ) | n.s.d.         |
| At4g18480 | n.s.d. | n.s.d.         | n.s.d.        | -1.3 ( 0.019 ) |
| At4g20260 | n.s.d. | n.s.d.         | n.s.d.        | n.s.d.         |
| At4g21280 | n.s.d. | n.s.d.         | n.s.d.        | 1.3 ( 0.016 )  |

|           |                      |                      |                       |                       |
|-----------|----------------------|----------------------|-----------------------|-----------------------|
| At4g23670 | n.s.d.               | <b>3.5</b> ( 0.004 ) | <b>-1.8</b> ( 0.043 ) | <b>1.8</b> ( 0.023 )  |
| At4g24280 | n.s.d.               | <b>1.4</b> ( 0.045 ) | n.s.d.                | n.s.d.                |
| At4g24770 | n.s.d.               | n.s.d.               | n.s.d.                | n.s.d.                |
| At4g25050 | n.s.d.               | n.s.d.               | n.s.d.                | n.s.d.                |
| At4g28750 | n.s.d.               | n.s.d.               | n.s.d.                | n.s.d.                |
| At4g29060 | n.s.d.               | n.s.d.               | n.s.d.                | n.s.d.                |
| At4g29350 | n.s.d.               | n.s.d.               | n.s.d.                | n.s.d.                |
| At4g32260 | n.s.d.               | n.s.d.               | <b>3.6</b> ( 0.033 )  | n.s.d.                |
| At4g34620 | n.s.d.               | n.s.d.               | n.s.d.                | n.s.d.                |
| At4g34870 | n.s.d.               | n.s.d.               | n.s.d.                | n.s.d.                |
| At4g35450 | n.s.d.               | n.s.d.               | n.s.d.                | <b>-2.7</b> ( 0.022 ) |
| At4g37930 | n.s.d.               | n.s.d.               | n.s.d.                | n.s.d.                |
| At4g38680 | n.s.d.               | n.s.d.               | n.s.d.                | n.s.d.                |
| At4g38970 | n.s.d.               | n.s.d.               | n.s.d.                | n.s.d.                |
| At4g39260 | n.s.d.               | n.s.d.               | n.s.d.                | n.s.d.                |
| At5g02240 | n.s.d.               | n.s.d.               | n.s.d.                | n.s.d.                |
| At5g02500 | n.s.d.               | n.s.d.               | n.s.d.                | n.s.d.                |
| At5g08280 | n.s.d.               | n.s.d.               | n.s.d.                | <b>-3.1</b> ( 0.016 ) |
| At5g08670 | n.s.d.               | n.s.d.               | n.s.d.                | n.s.d.                |
| At5g09650 | n.s.d.               | n.s.d.               | n.s.d.                | n.s.d.                |
| At5g12140 | n.s.d.               | n.s.d.               | n.s.d.                | n.s.d.                |
| At5g14740 | n.s.d.               | n.s.d.               | n.s.d.                | n.s.d.                |
| At5g14910 | n.s.d.               | n.s.d.               | n.s.d.                | n.s.d.                |
| At5g15090 | n.s.d.               | n.s.d.               | <b>1.6</b> ( 0.047 )  | n.s.d.                |
| At5g15970 | <b>3.6</b> ( 0.004 ) | n.s.d.               | n.s.d.                | n.s.d.                |
| At5g16710 | n.s.d.               | <b>1.9</b> ( 0.032 ) | n.s.d.                | n.s.d.                |
| At5g17170 | n.s.d.               | n.s.d.               | n.s.d.                | n.s.d.                |
| At5g19510 | n.s.d.               | n.s.d.               | n.s.d.                | n.s.d.                |
| At5g20720 | n.s.d.               | <b>1.5</b> ( 0.044 ) | n.s.d.                | n.s.d.                |
| At5g35630 | n.s.d.               | n.s.d.               | n.s.d.                | n.s.d.                |
| At5g38410 | n.s.d.               | n.s.d.               | n.s.d.                | n.s.d.                |
| At5g38430 | n.s.d.               | n.s.d.               | n.s.d.                | n.s.d.                |
| At5g54600 | n.s.d.               | n.s.d.               | n.s.d.                | n.s.d.                |
| At5g54770 | n.s.d.               | n.s.d.               | n.s.d.                | n.s.d.                |
| At5g61410 | n.s.d.               | n.s.d.               | n.s.d.                | n.s.d.                |

|            |              |                       |              |                      |        |                                      |
|------------|--------------|-----------------------|--------------|----------------------|--------|--------------------------------------|
| At5g63400  | n.s.d.       | n.s.d.                | n.s.d.       | n.s.d.               | n.s.d. |                                      |
| At5g66570  | n.s.d.       | n.s.d.                | n.s.d.       | n.s.d.               | n.s.d. |                                      |
| ATPA_ARATH | n.s.d.       | n.s.d.                | n.s.d.       | n.s.d.               | n.s.d. |                                      |
| ATPB_ARATH | n.s.d.       | n.s.d.                | n.s.d.       | n.s.d.               | n.s.d. |                                      |
| ATPE_ARATH | n.s.d.       | n.s.d.                | n.s.d.       | n.s.d.               | n.s.d. |                                      |
| CYF_ARATH  | n.s.d.       | n.s.d.                | n.s.d.       | n.s.d.               | n.s.d. |                                      |
| PSBC_ARATH | n.s.d.       | n.s.d.                | n.s.d.       | n.s.d.               | n.s.d. |                                      |
| RBL_ARATH  | n.s.d.       | n.s.d.                | n.s.d.       | n.s.d.               | n.s.d. |                                      |
| At1g02500  | n.s.d.       | <b>-4.3</b> ( 0.007 ) | n.s.d.       | not detected         |        |                                      |
| At1g04480  | n.s.d.       | n.s.d.                | not detected | n.s.d.               |        |                                      |
| At1g14810  | n.s.d.       | n.s.d.                | not detected | not detected         |        |                                      |
| At1g17880  | n.s.d.       | n.s.d.                | detected     | not detected         |        |                                      |
| At1g20620  | n.s.d.       | n.s.d.                | n.s.d.       | n.s.d.               |        | not detected Col-0 20°C              |
| At1g24020  | n.s.d.       | n.s.d.                | not detected | n.s.d.               |        |                                      |
| At1g52230  | n.s.d.       | n.s.d.                | detected     | n.s.d.               |        | not detected PGM 20°C                |
| At1g54630  | n.s.d.       | not detected          | n.s.d.       | not detected         |        |                                      |
| At1g65980  | n.s.d.       | <b>4.2</b> ( 0.031 )  | detected     | n.s.d.               |        |                                      |
| At2g03440  | n.s.d.       | not detected          | n.s.d.       | <b>3.3</b> ( 0.045 ) |        |                                      |
| At2g30860  | n.s.d.       | n.s.d.                | n.s.d.       | n.s.d.               |        | not detected Col-0 20°C              |
| At2g33150  | n.s.d.       | n.s.d.                | not detected | n.s.d.               |        |                                      |
| At2g43560  | n.s.d.       | detected              | n.s.d.       | n.s.d.               |        |                                      |
| At2g44920  | not detected | n.s.d.                | not detected | n.s.d.               |        |                                      |
| At2g47400  | n.s.d.       | n.s.d.                | detected     | not detected         |        |                                      |
| At3g14210  | n.s.d.       | n.s.d.                | n.s.d.       | n.s.d.               |        |                                      |
| At3g48870  | n.s.d.       | n.s.d.                | detected     | n.s.d.               |        | not detected Col-0 20°C und PGM 32°C |

|           |                           |                 |        |                 |                 |                         |
|-----------|---------------------------|-----------------|--------|-----------------|-----------------|-------------------------|
| At3g49110 | n.s.d.<br>not<br>detected | n.s.d.          | n.s.d. | not<br>detected | n.s.d.          |                         |
| At3g52100 | n.s.d.                    | n.s.d.          | n.s.d. | n.s.d.          | n.s.d.          |                         |
| At4g04020 | <b>4.0</b> ( 0.022 )      | n.s.d.          | n.s.d. | n.s.d.          | n.s.d.          | not detected PGM 20°C   |
| At4g13850 | <b>3.4</b> ( 0.033 )      | not<br>detected | n.s.d. | n.s.d.          | not<br>detected |                         |
| At4g20360 | n.s.d.                    | n.s.d.          | n.s.d. | n.s.d.          | n.s.d.          | not detected Col-0 20°C |
| At5g23060 | n.s.d.                    | n.s.d.          | n.s.d. | n.s.d.          | n.s.d.          | not detected Col-0 20°C |
